1 **Revelation of the Genetic Basis for Convergent Innovative Anal**  
2 **Fin Pigmentation Patterns in Cichlid Fishes**

3

4 Langyu Gu<sup>\*1,2</sup>, Chao Zhang<sup>3</sup>, Canwei Xia<sup>4</sup>

5

6 <sup>1</sup> Zoological Institute, University of Basel, Vesalgasse 1, 4051, Basel, Switzerland.

7 <sup>2</sup> Key Laboratory of Freshwater Fish Reproduction and Development, Ministry of Education,

8 Laboratory of Aquatic Science of Chongqing, School of Life Sciences, 400715, Southwest

9 University, Chongqing, China.

10 <sup>3</sup> Centre for Integrative Bioinformatics Department of Computer Science, VU Amsterdam,

11 De Boelelaan 1081A, 1081HV Amsterdam, the Netherlands.

12 <sup>4</sup> Ministry of Education Key Laboratory for Biodiversity and Ecological Engineering,

13 College of Life Sciences, Beijing Normal University, Beijing, China.

14

15 Author for Correspondence:

16 Langyu Gu,

17 Key Laboratory of Freshwater Fish Reproduction and Development, Ministry of Education,

18 Laboratory of Aquatic Science of Chongqing, School of Life Sciences, 400715, Southwest

19 University, Chongqing, China.

20 Tel: 008618513056804

21 email address: langyugu@gmail.com

22

23

24

25 **Abstract**

26

27 Determining whether convergent novelties share a common genetic basis is vital to  
28 understanding the extent to which evolution is predictable. The convergent evolution of  
29 innovative anal fin pigmentation patterns in cichlid fishes is an ideal model for studying this  
30 question. Here, we focused on two patterns: 1) egg-spots, circular pigmentation patterns in  
31 the haplochromine lineage with different numbers, sizes and positions; and 2) the blotch, with  
32 limited variation and an irregular boundary independently evolved in the ectodine lineage.  
33 However, how these two novelties originate and evolve still remains unclear. Based on a  
34 thorough comparative transcriptomic and genomic analysis, we observed a common genetic  
35 basis (i.e. genes related to pigment cells, signaling pathways and metabolic pathways) with  
36 high evolutionary rates and similar expression levels between egg-spots and the blotch.  
37 Furthermore, associations of common genes with transcription factors and the integration of  
38 advantageous signalling pathway genes with accelerated evolutionary rates were observed for  
39 the egg-spots gene network. Thus, we propose that the re-use of the common genetic basis  
40 indicates important conservative functions (e.g., toolkit genes) for the origin of these  
41 convergent novel phenotypes, whereas independently evolved associations of common genes  
42 with transcription factors and the integration of advantageous genes free the evolution of egg-  
43 spots to evolve as a key innovation for the adaptive radiation of cichlid fishes. This  
44 hypothesis will further illuminate the mechanism of the origin and evolution of novelties in a  
45 broad sense.

46

47 **Key words**

48 convergent evolution, novelty, gene network, egg-spots, the blotch, cichlid fishes

49

## 50 **Introduction**

51

52           How evolutionary novelties evolve remains an open question in evolutionary biology  
53 (Annona et al. 2015; Clark-Hachtel & Tomoyasu 2016; Soltis & Soltis 2016; Yong & Yu  
54 2016). Such novelties provide the raw materials for downstream selection, thereby  
55 contributing to biological diversification (Pigliucci & Müller 2010). Examples of  
56 evolutionary novelties are neural crest cells in vertebrates (Shimeld & Holland 2000), the  
57 beaks of birds (Bhullar et al. 2015; Bright et al. 2016), and eyespots on the wings of  
58 nymphalid butterflies (Monteiro 2015). Evolutionary novelty is generally defined in the  
59 context of character homology, e.g., as “*a structure that is neither homologous to any*  
60 *structure in the ancestral species nor serially homologous to any part of the same organism*”  
61 (Müller & Wagner 1991). However, the inference of homology is not always straightforward  
62 (Bang et al. 2002; Cracraft 2005; Panchen 2007; Hall 2013; Faunes et al. 2015). Wagner  
63 (Wagner 2007) thus proposed that homology should be inferred using information from the  
64 gene network underlying a trait. In this case, characters would be homologous if they shared  
65 the same underlying core gene network, whereas novelty would involve the evolution of a  
66 quasi-independent gene network, which integrates signals (e.g., input signals and effectors)  
67 into a gene expression pattern unique to that character (Wagner 2014). To what extent a gene  
68 network is “innovative” compared to the ancestral gene network, and how this gene network  
69 affects the evolution of a trait are interesting questions that remain unanswered.

70

71           In addition, similar traits can independently evolve in two or more lineages, such as  
72 the convergent evolution of echolocation in bats and whales (Shen et al. 2012) and anal fin  
73 pigmentation patterns in cichlid fishes (see below) (Salzburger et al. 2007; Santos et al.  
74 2016). Whether convergent phenotypes result from the same gene (e.g., *Mc1r* in mammals

75 (Hoekstra et al. 2006) and birds (San-Jose et al. 2015)) or not (e.g., anti-freezing protein  
76 genes (Chen et al. 1997) in Antarctic notothenioid and Arctic cod)), and the extent to which  
77 evolution is predictable (Stern 2013) have long been discussed, but no agreement has been  
78 reached (Arendt et al. 2008; Stern 2013). Actually, convergent phenotypes can partially share  
79 a common genetic basis, for example, independently re-deploy conserved toolkit genes (wing  
80 patterns in *Heliconius* butterfly (Joron et al. 2006) and the repeated emergence of yeasts  
81 (Nagy et al. 2014)), or different genes within the same pathway (Berens et al. 2015).  
82 Alternatively, these phenotypes can also be derived from deep homology based on ancestral  
83 structure (Shubin et al. 2009). Therefore, instead of simply focusing on whether convergent  
84 phenotypes are derived from the same genes, it is important to answer the following  
85 questions: 1) To what extent does the common genetic basis apply to convergent evolution?  
86 2) Among the genes expressed in independently evolved traits, which genes are conserved?  
87 3) What are the roles of these genes in the evolution of convergent phenotypes? 4) How did  
88 these genes evolve in independent lineages, i.e., are they deeply homologized or  
89 independently recruited? The answers to these questions at both the individual gene and gene  
90 network levels will give a clue about the genetic basis of the origin and evolution of novelty.

91

92 East African cichlid fishes, exposed to explosive radiation within millions and even  
93 hundreds of thousands of years, are classical evolutionary model species (Kocher 2004;  
94 Salzburger 2009). The relatively close genetic background (Salzburger 2009; Brawand et al.  
95 2014) of these fishes and availability of genomics data (Brawand et al. 2014) provide  
96 powerful tools to study the relationship between phenotype and genotype. Many convergent  
97 phenotypes have been identified in cichlid fishes, such as thick lip (Colombo et al. 2013),  
98 lower pharyngeal jaw (Muschick et al. 2012), and the convergent evolution of anal fin  
99 pigmentation patterns, a new model to study the origin of evolutionary novelty (Salzburger et

100 al. 2007; Santos et al. 2016). Two anal fin pigmentation patterns have primarily been  
101 described in independently evolved lineages: egg-spots, i.e., conspicuous pigmentation  
102 patterns with a circular boundary in the most species-rich lineage, i.e., haplochromine  
103 lineage; and the blotch, with an irregular boundary in ectodine lineage (Fig 1). Egg-spots  
104 exhibit large varieties (different numbers, sizes, colours and positions) among different  
105 species (Salzburger et al. 2007) and have been associated with sexual selection (female  
106 attraction (Wickler 1962; Hert 1989)) and male-male competition (Theis et al. 2012, 2015).  
107 Although not studied as thoroughly as egg-spots, the blotch has also been associated with  
108 female attraction (Wickler 1962).

109

110 Previous studies have begun to dissect the genetic underpinnings and evolutionary  
111 origin of egg-spots. For example, *csflra*, a gene implicated in yellow to reddish pigment cells  
112 (xanthophores), is expressed in egg-spots and has undergone adaptive sequence evolution in  
113 the ancestral lineage of haplochromines (Salzburger et al. 2007). Subsequently, a *cis*-  
114 regulatory change in the form of a transposable element (TE) insertion upstream of *fhl2b*  
115 resulting in a gain of expression in iridophores (another type of pigment cells) was causally  
116 associated with the origin of egg-spots (Santos et al. 2014). More recently, Santos et al.  
117 (Santos et al. 2016) suggested that the blotch and egg-spots do not share a common genetic  
118 basis (Santos et al. 2016) with rather distinct expression patterns. However, this study was  
119 based on the gene expression profile of 46 out of 1229 (3.7%) candidate genes; and the  
120 investigated genes were only egg-spots-related candidate genes that did not reflect the  
121 expression pattern of the blotch. Therefore, it is still too early to draw this conclusion.

122

123 Therefore, to investigate the genetic basis of the emergence of these two convergent  
124 novelties, and characterize the mechanism underlying their evolutionary differences (large

125 varieties of egg-spots but no variation for the blotch), we conducted a thorough comparative  
126 transcriptomic and genomic analysis with respect to the gene network, proposing the origin  
127 and evolution of these two convergent novel phenotypes in an evolutionary scope.

128

## 129 **Results**

130

### 131 **DE genes for the blotch and egg-spots**

132

133 Illumina-based RNA sequencing of anal fin tissues of *C. macrops* generated between  
134 15 to 23 million raw reads per library. The average read quality was 28. Approximately  
135 40,000 to 160,000 reads were trimmed through adaptor trimming (the exact read numbers  
136 were provided in Additional File 1). Between eight to ten million reads per library were  
137 finally mapped to the Tilapia transcriptome assembly available from the Broad Institute  
138 ([ftp://ftp.ensembl.org/pub/release-81/fasta/oreochromis\\_niloticus/cdna/](ftp://ftp.ensembl.org/pub/release-81/fasta/oreochromis_niloticus/cdna/). version 0.71) as a  
139 reference. Illumina reads are available from the Sequence Read Archive (SRA) at NCBI  
140 under accession number SRA SRP082469.

141

142 To obtain blotch-specific genes, the controlling position and sex-determining effects  
143 involving the blotch and non-blotch anal fin tissues of males and females were compared.  
144 Briefly, we determined the differentially expressed (DE) genes between the blotch and non-  
145 blotch tissues in males. This set of genes was associated with the blotch pattern formation,  
146 but could also be associated with distal fin position patterning without affecting blotch  
147 formation. To control this positional effect, we compared the corresponding anal fin tissues in  
148 females, generating a list of potentially sex-specific DE genes related to distal fin pattern  
149 formation. However, further comparisons between females and males excluded both

150 positional and sex-specific effects. Using edgeR (Robinson & Smyth 2007, 2008; Robinson  
151 et al. 2010; McCarthy et al. 2012; Zhou et al. 2013), we thus identified 263 significantly  
152 over-expressed genes and 11 significantly under-expressed genes in the blotch tissue. Re-  
153 analysis of the raw data for egg-spots and non-egg-spots from Santos et al. (Santos et al.  
154 2016) revealed 351 significantly over-expressed genes and 461 significantly under-expressed  
155 genes for egg-spots tissues.

156

### 157 **Comparative transcriptomic analysis for the blotch and egg-spots**

158

159 Forty-four genes showed similar gene expression patterns in both the blotch and egg-  
160 spots. Particularly for the top ten DE blotch-related candidate genes, six genes showed  
161 similar expression patterns in egg-spots, including two duplicated iridophore-related genes  
162 (*pnp4a* and *pnp5a*), the immunity-related gene *ly6d*, the ligand transporter-related gene  
163 apolipoprotein D (*ApoD*), and two genes previously associated with egg-spots formation  
164 (*fhl2a* and *fhl2b*) (Santos et al. 2014) (Table 1). Two genes showed high expression patterns  
165 in egg-spots, but low expression patterns in the blotch tissues, including the collagen-related  
166 gene *col8a1b* (Shellswell et al. 1980) and the immunity-related gene *steap4* (Benard et al.  
167 2014) (Table 2). Fifteen genes were over-expressed in the blotch tissues but were down-  
168 regulated in egg-spots (Table 2). Clustering analysis based on the expression levels of 44  
169 common genes clustered egg-spots and the blotch together, despite their species boundaries  
170 (Figure 1).

**Table 1** Top ten common blotch DE genes

|    | gene   | Ensembl            | logFC<br>the blotch | logFC<br>egg-spots | Ensembl Description                             |
|----|--------|--------------------|---------------------|--------------------|-------------------------------------------------|
| 1  | apod   | ENSONIT00000023475 | -3.58               | -0.91              | Apolipoprotein Da                               |
| 2  | fhl2b  | ENSONIT00000017889 | -3.56               | -1.71              | four and a half LIM domains 2b                  |
| 3  | pnp4a  | ENSONIT00000000731 | -3.52               | -1.37              | Purine nucleoside phosphorylase 4a              |
| 4  | ly6d   | ENSONIT00000024767 | -3.5                | -0.89              | lymphocyte antigen 6D-like                      |
| 5  | fhl2a  | ENSONIT00000015512 | -3.46               | -1.11              | four and a half LIM domains 2a                  |
| 6  | cecr5  | ENSONIT00000000334 | -3.32               | -1.66              | cat eye syndrome critical region protein 5-like |
| 7  | ifi30  | ENSONIT00000016006 | -3.29               | -1.37              | interferon, gamma-inducible protein 30          |
| 8  | gpnmb  | ENSONIT00000005686 | -3.21               | -1.1               | Glycoprotein (transmembrane) nmb                |
| 9  | TM4SF4 | ENSONIT00000005261 | -2.88               | -0.66              | TM4SF4                                          |
| 10 | plin5  | ENSONIT00000002684 | -2.87               | -1.11              | perilipin-5-like                                |

171  
172

**Table 2** DE genes with contrasting expression patterns between the blotch and egg-spots

|    | gene     | Ensembl             | logFC<br>the blotch | logFC<br>egg-spots | Ensembl Description                                      |
|----|----------|---------------------|---------------------|--------------------|----------------------------------------------------------|
| 1  | pnp5a    | ENSONIT00000016474  | -3.55               | 0.77               | Purine nucleoside phosphorylase 5a                       |
| 2  | BDH1     | ENSONIT00000016804  | -3.18               | 1.06               | D-beta-hydroxybutyrate dehydrogenase, mitochondrial-like |
| 3  | keratin  | ENSONIT00000023698  | -2.96               | 1.19               | keratin, type I cytoskeletal 20-like                     |
| 4  | egfl6    | ENSONIT00000020235  | -1.96               | 0.89               | EGF-like-domain, multiple 6                              |
| 5  | KIF5B    | ENSONIT00000004756  | -1.93               | 0.82               | Kinesin family member 5B                                 |
| 6  | hmx4     | ENSONIT00000004437  | -1.83               | 1.67               | H6 family homeobox 4                                     |
| 7  | calb2a   | ENSONIT00000014036  | -1.8                | 0.74               | Calbindin 2a                                             |
| 8  | dhrsx    | ENSONIT00000009275  | -1.58               | 0.87               | Dehydrogenase/reductase (SDR family) X-linked            |
| 9  | tgm112   | ENSONIT00000003616  | -1.35               | 0.6                | Transglutaminase 1 like 2                                |
| 10 | KIF5B    | ENSONIT00000004755  | -1.25               | 0.79               | Kinesin family member 5B                                 |
| 11 | cx43     | ENSONIT00000026288  | -1.24               | 0.77               | Connexin 43                                              |
| 12 | KIAA2026 | ENSONIT00000017688  | -0.94               | 0.78               | KIAA2026                                                 |
| 13 | oca2     | ENSONIT000000006160 | -0.94               | 1.1                | Oculocutaneous albinism II                               |
| 14 | fosb     | ENSONIT00000004670  | -0.84               | 1.29               | FBJ murine osteosarcoma viral oncogene homolog B         |
| 15 | hcst     | ENSONIT000000003510 | -0.84               | 0.56               | Hematopoietic cell signal transducer                     |
| 16 | steap4   | ENSONIT00000007508  | 0.61                | -0.53              | STEAP family member 4                                    |
| 17 | col8a1b  | ENSONIT00000023612  | 2.17                | -0.94              | Collagen, type XII, alpha 1b                             |

173  
174



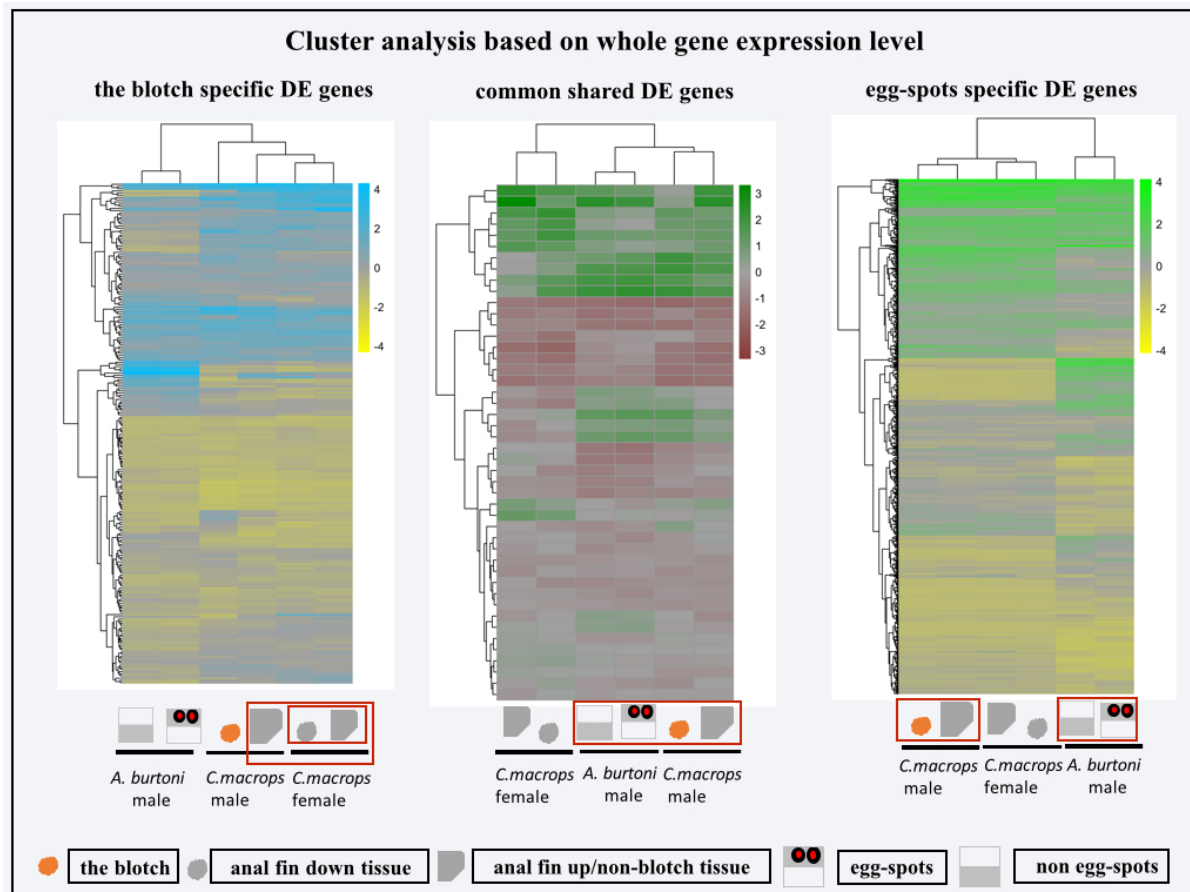

175

176 **Figure 1** Clustering analysis based on the gene expression level of common differentially expressed (DE) genes  
 177 and pattern-specific DE genes of anal fin pigmentation patterns. The cluster analysis was conducted with the  
 178 blotch and non-blotch tissues in male fish, the corresponding tissues in the female cichlid fish *C. macrops*, and  
 179 egg-spots and non-egg-spots tissues in the male cichlid fish *A. burtoni*.

180

181 More than 50% GO terms (Biological Process, Molecular Evolution and Cellular  
 182 Component) and pathways were shared between the blotch and egg-spots (Figure 2a). GO  
 183 enrichment analysis (FDR<0.1) showed that the common shared enriched GO terms were  
 184 primarily related to pigmentation, including pigmentation cell differentiation (GO: 0050931),  
 185 pigment granule organization (GO: 0048753), melano-related terms (GO:0030318, GO:  
 186 0032438, GO: 0004962), iridophore-related GO term (GO: 0050935), and nucleobase-  
 187 containing small molecule metabolic process (GO: 0055086) (Figure 2b).

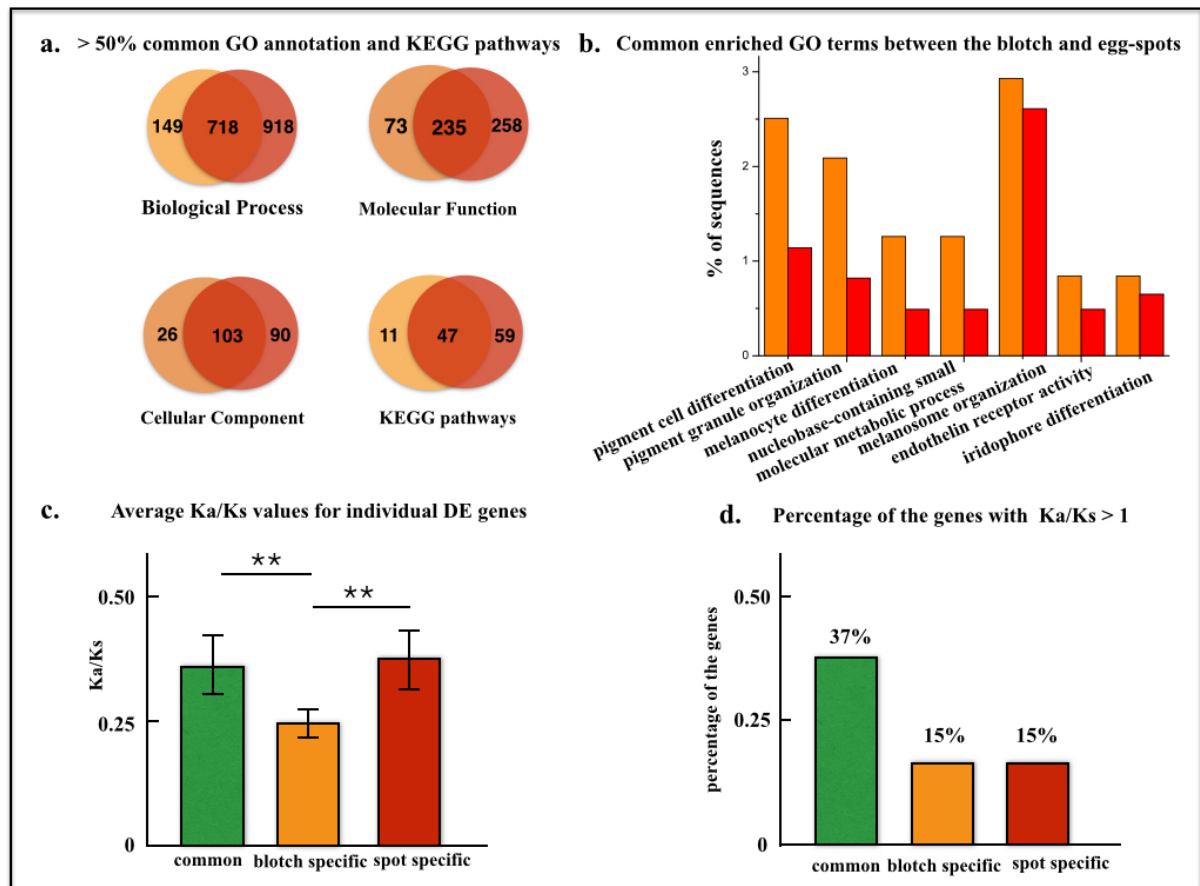

188

189 **Figure 2** Common genetic basis was shared between the blotch and egg-spots with accelerated evolutionary  
 190 rates. (a) > 50% common shared Gene annotation (GO) terms and pathways between the blotch and egg-spots.  
 191 (b) Common enriched GO terms between the blotch and egg-spots (FDR<0.01). (c) Average evolutionary rates  
 192 (Ka/Ks) of common shared differentially expressed (DE) genes, the blotch-specific DE genes and egg-spots-  
 193 specific DE genes. \*\* represents p<0.01. (d) Statistics of the genes with Ka/Ks values larger than one in  
 194 common genes, the blotch-specific DE genes and egg-spots-specific DE genes, respectively.

195

## 196 Evolutionary rate detection for DE genes and related pathways

197

198 To compare the evolutionary rates of common shared and pattern-specific DE genes  
 199 between the blotch and egg-spots, we calculated the average pairwise Ka/Ks values of the DE  
 200 genes based on the data from five available cichlid fishes and *C. macrops* in the present  
 201 study. The average Ka/Ks value of common genes showed a significantly higher rate than the  
 202 value of the blotch-specific DE genes, but not higher than the egg-spots-specific DE genes

203 (Figure 2c, Additional file 2). Common genes also showed a higher percentage of DE genes  
204 with Ka/Ks values larger than 1 (Figure 2d, Additional file 2), explaining the high average  
205 Ka/Ks values of the common genes.

206

207 To determine the evolutionary rates of common and pattern-specific DE genes in the  
208 same and different pathways, we calculated the average Ka/Ks and dN/dS values using a  
209 free-ratio model. Both methods showed consistent results (Figure 3, Additional file 2): 1) in  
210 general, in the common shared pathways, egg-spots DE genes showed higher evolutionary  
211 rates than the blotch DE genes, consistent with the average Ka/Ks values calculated above  
212 (Figure 2c); 2) common DE genes showed higher evolutionary rates than the blotch DE genes  
213 in the common shared pathways, and occasionally showed even higher rates than egg-spots  
214 DE genes, confirming the previous results (Figure 2c); 3) egg-spots DE genes showed higher  
215 evolutionary rates primarily in signalling pathways and metabolism pathways, in which genes  
216 related to egg-spots-specific pathways play an important role; and 4) the blotch DE genes  
217 primarily showed higher evolutionary rates in other pathways (Figure 3a and 3b), although  
218 several individual pathways showed high average Ka/Ks rates in signalling pathways (Figure  
219 3a), but not in the free-ratio model. This finding primarily reflects a novel gene  
220 (ENSONIG00000013347) with an average Ka/Ks value larger than 1. This difference could  
221 reflect the fact that the dN/dS value was calculated in a lineage-specific manner using the  
222 free-ratio model instead of averaging across different species. This result did not affect the  
223 consistent general observation that egg-spots DE genes primarily showed higher evolutionary  
224 rates than the blotch DE genes, particularly in signalling pathways and metabolic pathways.

225

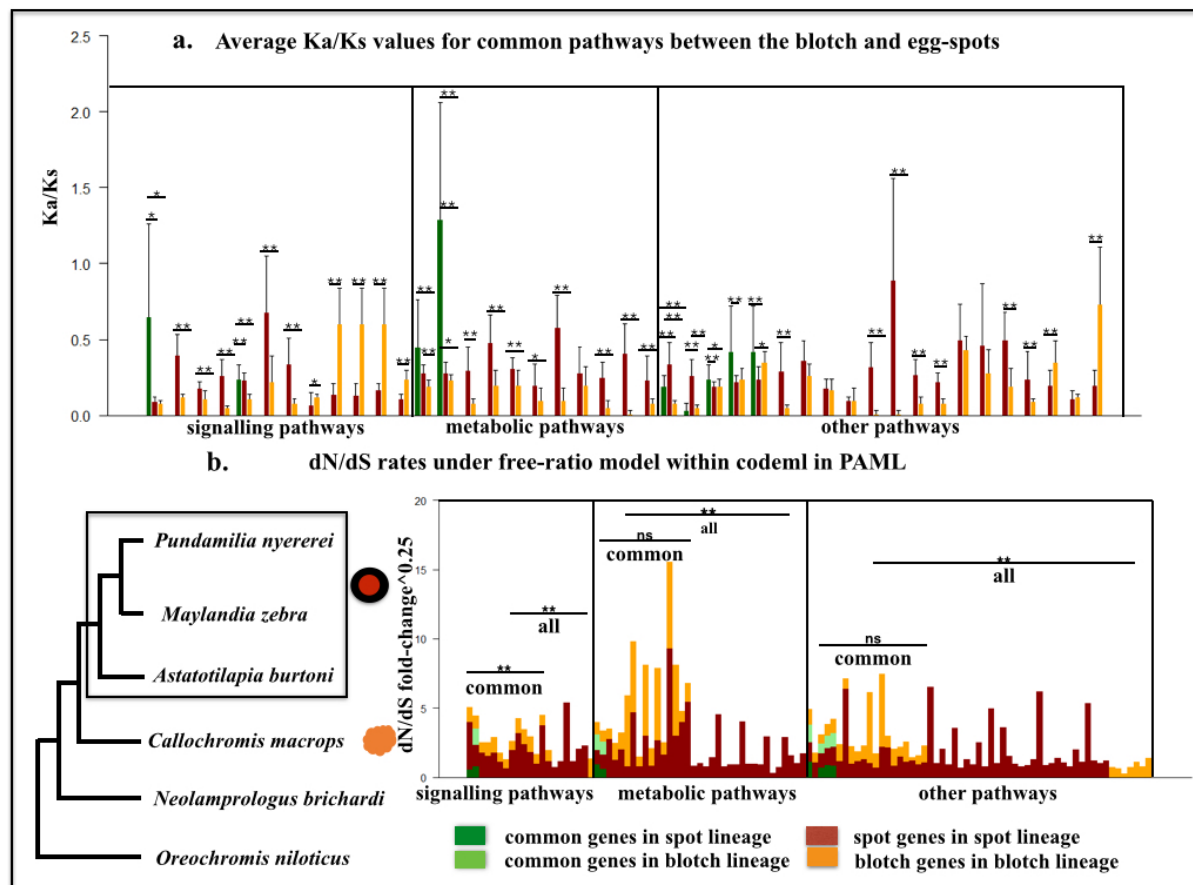

226

227 **Figure 3** Evolutionary rates calculation for anal fin pigmentation differentially expressed (DE) genes related  
 228 pathways. (a) Average evolutionary rates (Ka/Ks) values of common shared signalling pathways between the  
 229 blotch and egg/spots. \*represents  $p < 0.05$ , \*\*represents  $p < 0.01$ . (b) Rates of evolution (dN/dS) for common  
 230 shared and pattern-specific pathways using the free-ratio model in a lineage-specific manner within codeml in  
 231 PAML. Fold-change ratios of the genes in the corresponding lineage were calculated and compared.  
 232 \*\*represents  $p < 0.01$ , ns represents no significance.

233

### 234 **First common neighbour gene networks (FCN) of the blotch and egg-spots DE genes**

235

236 To characterize interactions of these DE genes, we examined their protein-protein  
 237 interaction networks. Network enrichment analysis in both the blotch and egg-spots showed  
 238 that these genes had more interactions among themselves than what would be expected from  
 239 the genome ( $p < 0.01$ ), suggesting that these genes are at least partially biologically related as  
 240 a group (<https://string-db.org/>), which further confirmed the robustness of the experimental

241 design. To predict the roles of these common genes in the network and determine whether  
242 they have similar functions in both the blotch and egg-spots, we compared their first  
243 neighbour gene network (FCN) (Figure 4), as direct interactions among genes can indicate  
244 their roles to a maximum extent. These FCNs showed significantly higher interaction levels  
245 than the total DE genes (Table 3), suggesting that the FCN of common genes belongs to a  
246 core gene network.

247

**Table 3** Statistics of degree of first common neighbour gene network (FCN)

| comparison                  | average                       | W      | p-value | significance |
|-----------------------------|-------------------------------|--------|---------|--------------|
| blotch FCN vs. blotch total | 6.08+/-4.24 vs. 4.11+/-3.85   | 5135.5 | <0.01   | **           |
| spot FCN vs. spot total     | 9.27+/-9.69 vs. 5.75+/-6.31   | 34364  | <0.01   | **           |
| blotch CCN vs. spot CCN     | 5.81+/-4.13 vs. 11.33+/-10.66 | 186.5  | 0.04    | *            |
| blotch SCN vs. spot SCN     | 6.17+/-4.36 vs. 8.47+/-9.29   | 2097.5 | 0.56    | ns           |

248 method: Mann-Whitney U test

249

250 Two types of FCNs were formed: 1) direct interactions among the common genes,  
251 comprising pigmentation (melanophore and xanthophore)-related genes (Figure 4) (core  
252 common network, CCN). Notably, unlike in the blotch, the CCN in egg-spots integrated more  
253 transcription factors (TFs) (Figure 4), largely contributing to its higher interaction degree  
254 (Table 3). 2) The second type of FCN involved interactions among common genes and  
255 pattern-specific DE genes (specific common network, SCN). Unlike the CCN, the common  
256 genes in SCN were only loosely associated (Figure 4). For example, the SCN of the blotch  
257 could clearly be divided into sub-networks, connected only by two common genes (*myo5aa*  
258 and *pde7b*) (Figure 4). However, the common genes of the SCN in egg-spots (8.47±9.29)  
259 participated in more interactions than in the blotch (6.17±4.36), although no significance was  
260 detected, which likely reflects the limited sample size (Table 3). In addition, genes related to  
261 purine metabolism pathways were detected in the SCN of the blotch, but more signalling  
262 pathways were involved in the SCN of egg-spots (Figure 5).

263

264           The evolutionary rates of common genes were significantly higher than those of  
265 pattern--specific DE genes in both the CCN and SCN of the blotch, but not those of the egg-  
266 spots (Figure 4), and egg-spots DE genes showed significantly higher evolutionary rates than  
267 the blotch DE genes in both the CCN and SCN (Figure 4). These findings are also consistent  
268 with previous results, showing that the average Ka/Ks value of common DE genes and egg-  
269 spots DE genes were significantly higher than those of the blotch-specific DE genes (Figure  
270 2).

271

272           In addition, several novel genes were involved in first neighbour gene networks  
273 (Figure 4). Since the interactions among genes indicate their similar functions, the network  
274 presented here enabled the prediction of new gene functions. For example, in the CCN of the  
275 blotch, the novel gene ENSONIG00000017631 interacted with *mitfb*, *mc1r* and *sox10*,  
276 suggesting a similar role related to melanin (Hou et al. 2006; San-Jose et al. 2015). The  
277 blotch-specific novel gene ENSONIG00000021415 interacted with *mitfb*, *pax7a* and *pax7b*  
278 (Minchin & Hughes 2008; Curran et al. 2010), suggesting a xanthophore-related role.

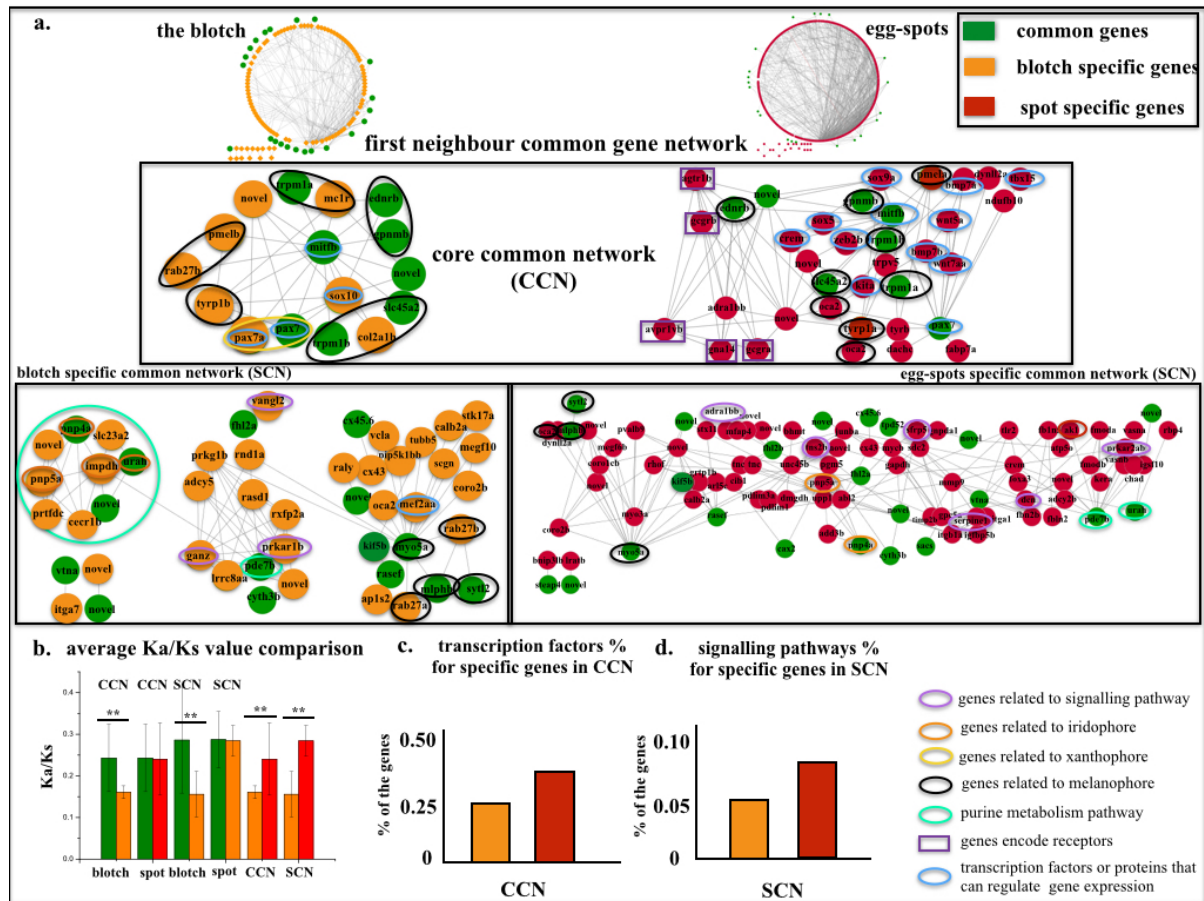

279

280 **Figure 4** First common neighbour gene interaction network analysis for the blotch and egg-spots DE genes. (a)  
 281 First common neighbour gene network between the blotch and egg-spots, including core common gene network  
 282 (CCN), primarily comprising direct interactions among pigment cells (above), and the specific core gene  
 283 network (SCN), comprising interactions among common genes and pattern-specific DE genes (below). (b)  
 284 Evolutionary rates (Ka/Ks) of different genes from the CCN and SCN between the blotch and egg-spots.  
 285 \*\*represents  $p < 0.01$ . (c) Percentage of transcription factors (TFs) in the corresponding gene network between  
 286 the blotch and egg-spots. (d) Percentage of signalling pathway genes in the corresponding gene network  
 287 between the blotch and egg-spots.

288

## 289 Discussion

290

291 The thorough comparative transcriptomic and genomic data analysis conducted herein  
 292 revealed a common genetic basis with higher evolutionary rates between the blotch and egg-  
 293 spots. Focusing on the whole expression level and expression patterns of both novelties

294 prevents potential biases that lead to different and even opposite conclusions  
295 from Santos et al. (Santos et al. 2016). Here, we proposed that the common genetic basis is  
296 essential for the emergence of these novel phenotypes, and independently evolved  
297 connections between common genes and TFs and the integration of advantageous genes  
298 involved in the signalling and metabolic pathways are crucial for the emergence and  
299 evolution of egg-spots.

300

301 **Common genetic basis is important for the evolution of convergent novel anal fin**  
302 **pigmentation patterns**

303

304 Similar gene expression patterns in convergent taxa are generally associated with  
305 conserved and important roles (such as toolkit genes) in the origin of phenotype (Khaitovich  
306 et al. 2006; Pankey et al. 2014). In the present study, clustering analysis based on gene  
307 expression level of common genes clustered egg-spots and the blotch together in spite of  
308 species boundary, suggesting that convergent evolution of anal fin pigmentation patterns is in  
309 parallel with gene expression level, at least on the common genetic basis level. Furthermore,  
310 the gene *fhl2b*, which was associated with egg-spots formation (Santos et al. 2014) was also  
311 observed ranking at the top of the blotch candidate DE gene list in the present study (Table  
312 1). Re-use of the same gene further attached their importance of common gene to the  
313 formation of both egg-spots and the blotch. These common genes also showed higher  
314 accelerated evolutionary rates than the blotch-specific DE genes, evincing their advantageous  
315 roles during the evolution. The average Ka/Ks value of egg-spots DE genes was higher than  
316 the previous results from Santos et al. (Santos et al. 2016), which could be explained by the  
317 fact that we integrated into the present data analysis the recent duplicated genes, which are  
318 too important for the evolution in fish to ignore (Glasauer & Neuhauss 2014). All of these



319 highlighted the importance of the common genes we observed for the emergence of these  
320 novel sexually related traits.

321

322 Then what is the common genetic basis and its roles in the convergent evolution of  
323 anal fin pigmentation patterns? Both GO enrichment and gene network construction showed  
324 that the common genes primarily comprise pigmentation-related genes. Interactions among  
325 pigment cells (melanophore, iridophore and xanthophore) are important for pigmentation  
326 pattern formation (Parichy 2009; Parichy & Spiewak 2015; Singh & Nüsslein-Volhard 2015;  
327 Watanabe & Kondo 2015). For example, the mutation of melanophore-related genes (*mitfb*,  
328 *gpnmb*, *trpm1a*, *ednrb*, *trpm1b* and *sox10*), the iridophore-related gene (*pnp4a*), the  
329 xanthophore-related gene (*pax7*), and the connexion-related gene *cx45.6* could induce the  
330 irregular stripe pattern formation in zebrafish (Shin et al. 1999; Hou et al. 2006; Minchin &  
331 Hughes 2008; Curran et al. 2010; Zhang et al. 2012; Reissmann & Ludwig 2013; Irion et al.  
332 2014), suggesting important roles for these genes in the corresponding core gene network.  
333 The genes *fhl2b* (iridophore-related gene), *pax7* (xanthophore-related gene) and *melanocortin*  
334 were also associated with pigmentation pattern formation in cichlid fishes (Salzburger et al.  
335 2007; Santos et al. 2014; Dijkstra et al. 2017). These genes were detected among the common  
336 candidate gene list and FCN networks in the present study. Here, these genes could have  
337 similar roles belonging to the core gene network of anal fin pigmentation pattern formation.  
338 This idea was further confirmed by the finding that the gene network comprising these genes  
339 showed a significantly higher interaction degree than the average interaction degree of total  
340 pattern DE genes (Table 3) and accelerated evolutionary rates (Figure 4).

341

342 In addition, metabolism related pathways and signalling pathways occupied a large  
343 portion of the shared pathways between the blotch and egg-spots. Actually, it is unsurprising

344 that metabolism pathways were involved in these sexually related traits, considering the  
345 importance of trade-off of the energy allocation between the survival and reproduction (Bleu  
346 et al. 2016). Signalling pathways such as Wnt signalling pathway, ErbB signalling pathway  
347 and MAPK signalling pathway related to the pattern formation and morphogenesis (Budi et  
348 al. 2008; Martin et al. 2012; Schneider et al. 2012; Plestant & Anton 2013; Martin & Reed  
349 2014) can have similar roles here and are advantageous to the emergence of these novel anal  
350 fin pigmentation patterns, considering their accelerated evolutionary rates. This could be  
351 explained by the reasoning that the trait itself is under selection so that the related genes  
352 showed accelerated evolutionary rates, or alternatively that the formation of anal fin patterns  
353 integrated genes with accelerated evolutionary rates in the pathways during evolution, which  
354 conserved the phenotype during evolution. Since common genes showed significantly higher  
355 evolutionary rates than pattern specific genes, we prefer the later possibility. In spite of this,  
356 they both reconfirmed the conclusion that common genetic basis is important for the  
357 emergence and evolution of these convergent anal fin pigmentation patterns.

358

359 **Independently evolved connections among common genes and pattern specific genes are**  
360 **crucial for the evolution and evolution of egg-spots**

361

362 Although both the blotch and egg-spots are novelties, their patterns are quite different  
363 (Figure 1). The blotch is a reddish pattern with an irregular boundary, whereas egg-spots are  
364 pigmentation patterns with circular transparent boundaries. In addition, these two novelties  
365 exhibit different evolutions. The blotch only appears in the ectodine lineage, with almost no  
366 variables among species. However, egg-spots exhibit significant diversity, including different  
367 numbers, sizes, positions and colours, in the species-rich haplochromine lineage (Salzburger  
368 et al. 2005; Santos & Salzburger 2012). The emergence of egg-spots is associated with the

369 radiation of cichlid fishes (Salzburger 2009). Therefore, it is important to understand the  
370 mechanism underlying their different evolution pattern.

371

372 Genes are not isolated from each other, but rather remain connected. Although  
373 common genes were shared between the blotch and egg-spots, more direct interactions were  
374 observed between common genes and egg-spots-specific DE genes than the blotch-specific  
375 DE genes (Table 3, Figure 5). This finding largely reflects additional connections with TFs  
376 and signalling pathways in the egg-spots gene network (Figure 5). New connections could be  
377 established by the insertion of transposable elements or a single nucleotide polymorphism  
378 mutation in the upstream region of target genes (e.g., *fhl2b* and *pax7a*), which can change  
379 binding opportunities to TFs to affect pigmentation pattern formation (Santos et al. 2014;  
380 Roberts et al. 2017). Gene network integrating pattern-related TFs and signalling pathways  
381 can become relatively independent to integrate signals into a gene expression pattern unique  
382 to that character, representing novelty (Wagner 2014), similar to the case of butterfly wing  
383 spot (Shirai et al. 2012). However, if the gene network of the novelty is still tightly linked to  
384 the ancestral gene network, such as the “Christmas tree model” for the wing spot  
385 development in fly, then the evolution of the phenotype will be limited (Wagner & Lynch  
386 2008). Therefore, the extent of independence of a gene network can be causally linked to the  
387 evolution of a trait (Wagner 2014), likely explaining the differences in evolution between  
388 egg-spots and the blotch: the relatively independent network comprising TFs and signalling  
389 pathways can free the evolution of egg-spots from the ancestral anal fin network to relatively  
390 freely evolve to a higher variety compared to the blotch (intrinsic factor, developmental  
391 constraint).

392

393 In addition, egg-spots showed significantly higher evolutionary rates in both the CCN  
394 and SCN compared to the blotch, which primarily reflected the associated TFs and signalling  
395 pathways, which occupied a large portion of the network. Higher evolutionary rates of  
396 signalling pathways and metabolic pathways of egg-spots DE genes further suggested that  
397 evolutionary advantageous genes recruited in the egg-spots gene network could help conserve  
398 the phenotype and subsequently evolve during evolution (extrinsic factor, selection) and  
399 causally link egg-spots to the adaptive radiation of cichlid fishes.

400

#### 401 **Hypothesis about the genetic basis of the origin and evolution of convergent novel anal** 402 **fin pigmentation patterns in cichlid fishes**

403

404 The findings of the present study drive a reassessment with respect to whether  
405 convergent pigmentation pattern formation in fish is as the same as that in mammals and  
406 birds, whose pigmentation pattern formation is controlled through a few genes (*MC1R* and  
407 *Agouti*) (Hoekstra et al. 2006; Uy et al. 2016), or should be viewed with respect to a gene  
408 network. For example, iridophores were observed as the prerequisites for stripe formation in  
409 zebrafish (*Danio rerio*) (Singh & Nüsslein-Volhard 2015), but not in its closely related  
410 species *D. albolineatus*, in which xanthophores play a crucial role (Patterson et al. 2014).  
411 Similar cases were also observed for skin (melanocortin-related genes and the xanthophore-  
412 related gene *pax7a*) (Dijkstra et al. 2017; Roberts et al. 2017) and anal fin (the xanthophore-  
413 related gene *csflra* and the iridophore-related gene *fhl2b*) (Salzburger et al. 2007; Santos et  
414 al. 2014) pigmentation pattern formation. This difference might reflect interactions among  
415 rather diversified pigment cells in fish, resulting in more complex pigmentation patterns than  
416 in mammals and birds.

417

418           Therefore, we propose one hypothesis with respect to a gene network that can explain  
419 the origin and evolution of convergent novel anal fin pigmentation patterns in cichlid fishes  
420 (Figure 5). On the one hand, common genes, comprising pigment cells, signalling pathways  
421 and metabolic pathways, are important for the emergence of these novel traits (intrinsic  
422 factor, developmental constraint). These genes could be derived from deep homology  
423 (Shubin et al. 2009; McCune & Schimenti 2012), i.e., pigment cells already present in the  
424 anal fin before the origination of these novel convergent pigmentation patterns (new  
425 structures can evolve by deploying pre-existing regulatory circuits (Shubin et al. 2009), or  
426 evolve independently. Accelerated evolutionary rates of common genes and pathways help  
427 conserve these novelties during evolution (extrinsic factor, selection). On the other hand,  
428 independently evolved connections with TFs and signalling pathways during evolution are  
429 important for the origin and evolution of egg-spots. These connections form a relatively  
430 independent gene network that frees egg-spots to evolve into diversified phenotypes  
431 (different numbers, positions, sizes and colours) (intrinsic factor, developmental constraint).  
432 Simultaneously, the integration of advantageous genes with accelerated evolutionary rates  
433 into the corresponding gene network can causally link egg-spots to the adaptive radiation in  
434 cichlid fishes as a key innovation (Salzburger et al. 2005, 2007; Salzburger 2009). In this  
435 case, egg-spots should be considered as “an innovation out of innovation”. The hypothesis  
436 here will further illuminate the mechanism of origin and evolution of novelties in a broad  
437 sense. Further thorough comparative transcriptomic and genomic analysis across the  
438 phylogeny, including more diversified anal fin pigmentation patterns,, will provide additional  
439 evidence for this evidence for this hypothesis.

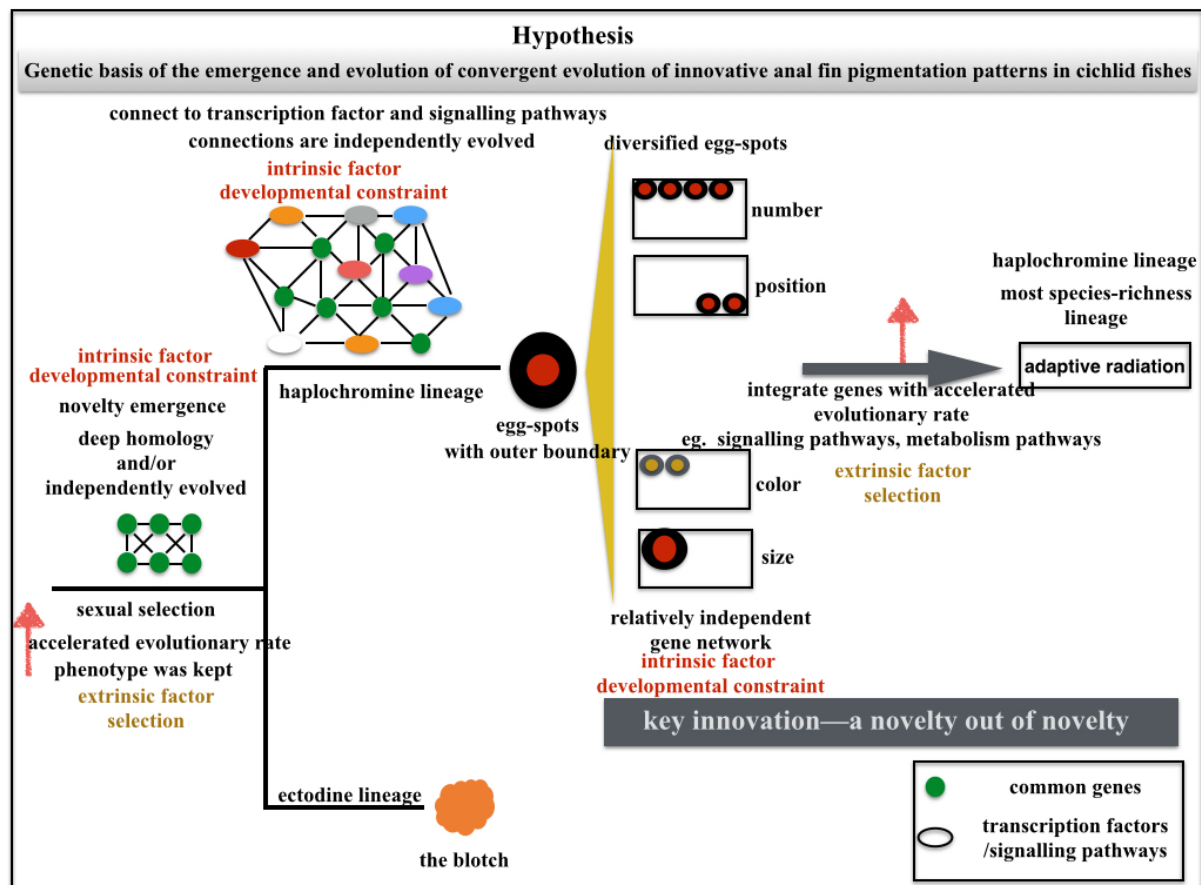

440

441 **Figure 5** Hypothesis concerning the genetic basis for convergent evolution of the blotch and egg-spots.

442 Common genes derived from deep homology or independently evolved are important for the emergence of  
 443 convergent novel anal fin pigmentation patterns (intrinsic factor, developmental constraint). The advantageous  
 444 roles of these genes during evolution helped conserve the novel traits during evolution (extrinsic factor,  
 445 selection). Independently evolved connections to transcription factors (TFs) and signalling pathways formed a  
 446 relatively independent gene network that could free the evolution of egg-spots from ancestral anal fin to evolve  
 447 into diversified phenotypes (different numbers, sizes, positions and colours) (intrinsic factor, developmental  
 448 constraint). Simultaneously, the integration of advantageous genes related to signalling pathways and metabolic  
 449 pathways with accelerated evolutionary rates in the corresponding gene network linked egg-spots to the adaptive  
 450 radiation in cichlid fishes as the key innovation (extrinsic factor, selection). In this case, egg-spots should be  
 451 considered “an innovation out of innovation”.

452

## 453 **Materials and Methods**

454

## 455 **Illumina-based RNAseq**

456

457 Laboratory strains of *C. macrops* were maintained at the University of Basel  
458 (Switzerland) under standard conditions (12-h light/12-h dark; 26°C, pH=7). Prior to tissue  
459 dissection, the specimens were euthanized with MS 222 (Sigma-Aldrich, USA) following  
460 approved procedures (permit nr. 2317 issued by the Cantonal Veterinary Office Veterinary  
461 Office). For RNAseq of *C. macrops*, we dissected the anal fins from three adult males and  
462 three adult females. In the male fins, we separated the blotch area from the remaining fin  
463 tissue; in the females, which do not possess the blotch, we separated the fin in the same way,  
464 i.e., the areas corresponding to the blotch and non-blotch tissue in males, resulting in a total  
465 of 12 samples for *C. macrops*. RNA extraction was performed using was performed using  
466 TRIzol® reagent (Invitrogen, USA). Sample clean up and DNase treatments treatments were  
467 performed using the using the RNA clean&Concentrator™-5 (Zymo Research Corporation,  
468 USA). RNA quality and quantity was determined using theusing the Nanodrop 1000  
469 spectrophotometer (Thermo Scientific, USA) and a Bioanalyser 2100 (Agilent Technologies,  
470 Germany). Libraries were generated using the Illumina TruSeq RNA Sample Preparation  
471 Preparation Kit (low-throughput protocol) according to the manufacturer's instructions. Per  
472 tissue, 330 ng of RNA was subjected to mRNA selection. Pooling and sequencing were  
473 performed at the Department of Biosystems Science and Engineering (D-BSSE), University  
474 of Basel and ETH-Zurich. Single-end sequencing of these pooled 12 samples was performed  
475 in one lane of an Illumina Genome Analyser Iix (maximum read length was 50 bp). The  
476 existing transcriptomic data for anal fin with egg-spots and without egg-spots of *A. burtoni*  
477 was retrieved from Santos et al. (Santos et al. 2016).

478

479 **Differential gene expression analysis for the blotch and egg-spots**

480

481           Quality assessment of the sequence reads for the blotch was conducted using Fastqc  
482 0.10.1 ([www.bioinformatics.babraham.ac.uk/projects/](http://www.bioinformatics.babraham.ac.uk/projects/)). Contaminated Illumina adapter were  
483 removed using cutadapt 1.3 (Martin 2011). The reads were subsequently aligned to the  
484 Tilapia transcriptome assembly available from Broad Institute  
485 ([ftp://ftp.ensembl.org/pub/release-81/fasta/oreochromis\\_niloticus/cdna/](ftp://ftp.ensembl.org/pub/release-81/fasta/oreochromis_niloticus/cdna/). version 0.71).  
486 NOVOINDEX ([www.novocraft.com/](http://www.novocraft.com/)) was used for indexing the reference and  
487 NOVOALIGN ([www.novocraft.com/](http://www.novocraft.com/)) was used for mapping the reads against the reference.  
488 The output SAM files of read mapping were subsequently transformed into the BAM format  
489 using SAMtools (Li et al. 2009). The count files were concatenated into count tables and  
490 analysed using the Bioconductor R package (Gentleman et al. 2004; Huber et al. 2015) and  
491 edgeR (Robinson & Smyth 2007, 2008; Robinson et al. 2010; McCarthy et al. 2012; Zhou et  
492 al. 2013). To compare blotch and non-blotch tissues, we used the individual as the block  
493 factor, since these tissues were paired. In analyses with edgeR, genes that achieved at least  
494 one count per million (cpm) in at least three samples were maintained. To reduce false  
495 positive numbers, differentially expressed transcripts were maintained if the false discovery  
496 rate (FDR) was smaller than 0.01. The existing transcriptomic data of anal fin with egg-spots  
497 and without egg-spots from three males of *A. burtoni* in Santos et al. (Santos et al. 2016)  
498 were re-analysed using the same parameters.

499

## 500 **Comparative transcriptomics between the blotch and egg-spots**

501

502           Gene expression clustering was visualized as a heatmap using the *pheatmap* R  
503 package v1.0.8 (<https://cran.r-project.org/web/packages/pheatmap/index.html>). Gene  
504 ontology (GO) annotation of the differential expressed transcripts was conducted with  
505 Blast2GO version 2.5.0 (Conesa et al. 2005). BLASTx searches were achieved using



506 BLASTx (threshold:  $e^{-6}$ ) and a number of hits of 10. KEGG (Kyoto Encyclopaedia of Genes  
507 and Genomes) pathway annotation was conducted with KAAS (KEGG Automatic  
508 Annotation Server) <http://www.genome.jp/tools/kaas/> (Moriya et al. 2007) using zebrafish as  
509 the reference with a threshold  $e$ -value of  $e^{-10}$ . Enrichment analysis of the GO terms was  
510 performed using DAVID (<https://david.ncifcrf.gov/>). Protein-protein interaction network  
511 analysis was conducted with the string database (<http://string-db.org/>). The network was  
512 visualized using Cytoscape v3.0 (Shannon et al. 2003).

513

### 514 **Evolutionary rates detection of DE genes and related pathways**

515

516 To detect the evolutionary rate of the coding sequences of DE genes, we extracted the  
517 protein-coding sequences for these DE genes by extracting the corresponding transcripts of  
518 tilapia retrieved from the Ensembl database (<http://www.ensembl.org/index.html>). These  
519 transcripts were used as references after removing codon sequences using Biopython  
520 (<http://biopython.org/wiki/Biopython>). The raw reads of transcriptomic data from the other  
521 four available cichlid species (*Pundamila nyererei*, *Neolamprologus brichardi*, *Maylandia*  
522 *zebra* and *A. burtoni*) were retrieved from the NCBI database  
523 (<https://www.ncbi.nlm.nih.gov/>). These data, together with transcriptome data of egg-spots  
524 and the blotch, were mapped to individual transcripts (without stop codon) trimmed to the  
525 reference using Geneious <http://www.geneious.com> (Kearse et al. 2012). To retrieve recently  
526 duplicated genes, we differentiated the variable single nucleotide polymorphisms deriving  
527 from duplicates by mapping these anomalies against the reference. We concatenated all the  
528 transcripts for each species using Geneious, followed by visual assessment. Subsequently, we  
529 constructed two rounds of consensus sequences through pairwise alignment between the  
530 target species and tilapia using MAFFT, which removes the variable single nucleotide

531 polymorphism according to the reference. The resulting concatenated sequences were  
532 translated into amino acids and re-mapped using existing transcriptome data, followed by  
533 visual assessment. To obtain individual transcripts, we annotated each transcript in  
534 concatenated sequences and subsequently extracted the transcripts using Geneious.

535

536 To detect the evolutionary rate of these DE genes, we aligned the sequences using  
537 T\_Coffee (Notredame et al. 2000) based on the codon sequence. Subsequently, pairwise  
538 Ka/Ks values were calculated using yn00 in PAML (Yang 1997, 2007). The pipeline was  
539 written in BioPerl <http://bioperl.org/>. To determine whether the same pattern also occurred in  
540 a lineage-specific manner, we detected the dN/dS values for individual DE genes using the  
541 free-ratio model within codeml in PAML.

542

543 **Additional File 1:** Illumina sequencing reads for the ectodine blotch in *C. macrops*.

544 **Additional File 2:** Average evolutionary rates (Ka/Ks) and comparison of the DE genes and  
545 related pathways between the blotch and egg-spots.

546

## 547 **Competing interests**

548

549 The authors declare that they have no competing interests.

550

## 551 **Authors' contributions**

552

553 LG designed the experiment and wrote the manuscript with the help from CZ. LG  
554 performed the RNAseq library construction and data analysis with the help from CZ and CX.

555 All authors read and approved the manuscript.

556 **Acknowledgements**

557

558 We particularly thank Prof. Walter Salzburger for the guidance and support for the  
559 project. We also particularly thank Dr. Emilia M. Santos for providing the raw transcriptomic  
560 data of egg-spots. Many thanks to Shengkai Pan, Yongjian Zhang, Lei Luo, Yongsheng Li,  
561 Jie Zhang, Tingting Zhou, De Chen for the discussion and suggestion. We thank Philippe  
562 Demougin and Ina Nissen for the assistance with Illumina sequencing. We also thank Attila  
563 Rüegg for the assistance in the aquarium room, Nicolas Boileau for the assistance in the lab  
564 and Brigitte Aeschbach for the laboratory apparatus organization. Illumina reads from this  
565 study are available at NCBI under the accession number SRP082469. Alignment sequences  
566 are available upon request from the corresponding author. This work was supported by the  
567 PhD grant from University of Basel, Switzerland and Postdoc funding from Southwest  
568 University, China.

569

570 **References**

571 Annona G et al. 2015. Evolution of the notochord. *Evodevo*. 6:30. doi: 10.1186/s13227-015-  
572 0025-3.

573 Arendt J et al. 2008. Convergence and parallelism reconsidered: what have we learned about  
574 the genetics of adaptation? *Trends Ecol. Evol.* 23:26–32. doi: 10.1016/j.tree.2007.09.011.

575 Bang R, Schultz TR, DeSalle R. 2002. Development, homology and systematics. *EXS*. 175–  
576 86. <http://www.ncbi.nlm.nih.gov/pubmed/11924496> (Accessed October 15, 2016).

577 Benard EL, Roobol SJ, Spaink HP, Meijer AH. 2014. Phagocytosis of mycobacteria by  
578 zebrafish macrophages is dependent on the scavenger receptor Marco, a key control factor of  
579 pro-inflammatory signalling. *Dev. Comp. Immunol.* 47:223–33. doi:  
580 10.1016/j.dci.2014.07.022.

- 581 Berens AJ, Hunt JH, Toth AL. 2015. Comparative Transcriptomics of Convergent Evolution:  
582 Different Genes but Conserved Pathways Underlie Caste Phenotypes across Lineages of  
583 Eusocial Insects. *Mol. Biol. Evol.* 32:690–703. doi: 10.1093/molbev/msu330.
- 584 Bhullar B-AS et al. 2015. A molecular mechanism for the origin of a key evolutionary  
585 innovation, the bird beak and palate, revealed by an integrative approach to major transitions  
586 in vertebrate history. *Evolution.* 69:1665–77. doi: 10.1111/evo.12684.
- 587 Bleu J, Gamelon M, Sæther B-E. 2016. Reproductive costs in terrestrial male vertebrates:  
588 insights from bird studies. *Proc. R. Soc. B Biol. Sci.* 283:20152600. doi:  
589 10.1098/rspb.2015.2600.
- 590 Brawand D et al. 2014. The genomic substrate for adaptive radiation in African cichlid fish.  
591 *Nature.* 513:375–81. doi: 10.1038/nature13726.
- 592 Bright JA, Marugán-Lobón J, Cobb SN, Rayfield EJ. 2016. The shapes of bird beaks are  
593 highly controlled by nondietary factors. *Proc. Natl. Acad. Sci. U. S. A.* 113:5352–5357. doi:  
594 10.1073/pnas.1602683113.
- 595 Budi EH, Patterson LB, Parichy DM. 2008. Embryonic requirements for ErbB signaling in  
596 neural crest development and adult pigment pattern formation. *Development.* 135:2603–14.  
597 doi: 10.1242/dev.019299.
- 598 Chen L, DeVries AL, Cheng CH. 1997. Convergent evolution of antifreeze glycoproteins in  
599 Antarctic notothenioid fish and Arctic cod. *Proc. Natl. Acad. Sci. U. S. A.* 94:3817–22.  
600 <http://www.ncbi.nlm.nih.gov/pubmed/9108061> (Accessed October 15, 2016).
- 601 Clark-Hachtel CM, Tomoyasu Y. 2016. Exploring the origin of insect wings from an evo-  
602 devo perspective. *Curr. Opin. Insect Sci.* 13:77–85. doi: 10.1016/j.cois.2015.12.005.
- 603 Colombo M et al. 2013. The ecological and genetic basis of convergent thick-lipped  
604 phenotypes in cichlid fishes. *Mol. Ecol.* 22:670–84. doi: 10.1111/mec.12029.
- 605 Conesa A et al. 2005. Blast2GO: a universal tool for annotation, visualization and analysis in

- 606 functional genomics research. *Bioinformatics*. 21:3674–6. doi:  
607 10.1093/bioinformatics/bti610.
- 608 Cracraft J. 2005. Phylogeny and evo-devo: Characters, homology, and the historical analysis  
609 of the evolution of development. *Zoology*. 108:345–356. doi: 10.1016/j.zool.2005.09.003.
- 610 Curran K et al. 2010. Interplay between Foxd3 and Mitf regulates cell fate plasticity in the  
611 zebrafish neural crest. *Dev. Biol.* 344:107–18. doi: 10.1016/j.ydbio.2010.04.023.
- 612 Dijkstra PD et al. 2017. The melanocortin system regulates body pigmentation and social  
613 behaviour in a colour polymorphic cichlid fish. *Proc. R. Soc. B Biol. Sci.* 284:20162838. doi:  
614 10.1098/rspb.2016.2838.
- 615 Faunes M, Francisco Botelho J, Ahumada Galleguillos P, Mpodozis J. 2015. On the  
616 hodological criterion for homology. *Front. Neurosci.* 9:223. doi: 10.3389/fnins.2015.00223.
- 617 Gentleman RC et al. 2004. Bioconductor: open software development for computational  
618 biology and bioinformatics. *Genome Biol.* 5:R80. doi: 10.1186/gb-2004-5-10-r80.
- 619 Glasauer SMK, Neuhauss SCF. 2014. Whole-genome duplication in teleost fishes and its  
620 evolutionary consequences. *Mol. Genet. Genomics.* 289:1045–60. doi: 10.1007/s00438-014-  
621 0889-2.
- 622 Hall BK. 2013. Homology, homoplasy, novelty, and behavior. *Dev. Psychobiol.* 55:4–12.  
623 doi: 10.1002/dev.21039.
- 624 Hert E. 1989. The function of egg-spots in an African mouth-brooding cichlid fish. *Anim.*  
625 *Behav.* 37:726–732. doi: 10.1016/0003-3472(89)90058-4.
- 626 Hoekstra HE, Hirschmann RJ, Bunday RA, Insel PA, Crossland JP. 2006. A single amino  
627 acid mutation contributes to adaptive beach mouse color pattern. *Science.* 313:101–4. doi:  
628 10.1126/science.1126121.
- 629 Hou L, Arnheiter H, Pavan WJ. 2006. Interspecies difference in the regulation of melanocyte  
630 development by SOX10 and MITF. *Proc. Natl. Acad. Sci. U. S. A.* 103:9081–5. doi:

- 631 10.1073/pnas.0603114103.
- 632 Huber W et al. 2015. Orchestrating high-throughput genomic analysis with Bioconductor.
- 633 Nat. Methods. 12:115–21. doi: 10.1038/nmeth.3252.
- 634 Irion U et al. 2014. Gap junctions composed of connexins 41.8 and 39.4 are essential for
- 635 colour pattern formation in zebrafish. Elife. 3:e05125. doi: 10.7554/eLife.05125.
- 636 Joron M, Jiggins CD, Papanicolaou A, McMillan WO. 2006. Heliconius wing patterns: an
- 637 evo-devo model for understanding phenotypic diversity. Heredity (Edinb). 97:157–67. doi:
- 638 10.1038/sj.hdy.6800873.
- 639 Kearse M et al. 2012. Geneious Basic: an integrated and extendable desktop software
- 640 platform for the organization and analysis of sequence data. Bioinformatics. 28:1647–9. doi:
- 641 10.1093/bioinformatics/bts199.
- 642 Khaitovich P, Enard W, Lachmann M, Pääbo S. 2006. Evolution of primate gene expression.
- 643 Nat. Rev. Genet. 7:693–702. doi: 10.1038/nrg1940.
- 644 Kocher TD. 2004. Adaptive evolution and explosive speciation: the cichlid fish model. Nat.
- 645 Rev. Genet. 5:288–98. doi: 10.1038/nrg1316.
- 646 Li H et al. 2009. The Sequence Alignment/Map format and SAMtools. Bioinformatics.
- 647 25:2078–9. doi: 10.1093/bioinformatics/btp352.
- 648 Martin A, Papa R, Nadeau N. 2012. Diversification of complex butterfly wing patterns by
- 649 repeated regulatory evolution of a Wnt ligand. Proc. ....
- 650 <https://www.pnas.org/content/109/31/12632.full> (Accessed April 12, 2016).
- 651 Martin A, Reed RD. 2014. Wnt signaling underlies evolution and development of the
- 652 butterfly wing pattern symmetry systems. Dev. Biol. 395:367–78. doi:
- 653 10.1016/j.ydbio.2014.08.031.
- 654 Martin M. 2011. Cutadapt removes adapter sequences from high-throughput sequencing
- 655 reads. EMBnet.journal. 17:10. doi: 10.14806/ej.17.1.200.

- 656 McCarthy DJ, Chen Y, Smyth GK. 2012. Differential expression analysis of multifactor  
657 RNA-Seq experiments with respect to biological variation. *Nucleic Acids Res.* 40:4288–97.  
658 doi: 10.1093/nar/gks042.
- 659 McCune AR, Schimenti JC. 2012. Using genetic networks and homology to understand the  
660 evolution of phenotypic traits. *Curr. Genomics.* 13:74–84. doi:  
661 10.2174/138920212799034785.
- 662 Minchin JEN, Hughes SM. 2008. Sequential actions of Pax3 and Pax7 drive xanthophore  
663 development in zebrafish neural crest. *Dev. Biol.* 317:508–22. doi:  
664 10.1016/j.ydbio.2008.02.058.
- 665 Monteiro A. 2015. Origin, development, and evolution of butterfly eyespots. *Annu. Rev.*  
666 *Entomol.* 60:253–71. doi: 10.1146/annurev-ento-010814-020942.
- 667 Moriya Y, Itoh M, Okuda S, Yoshizawa AC, Kanehisa M. 2007. KAAS: an automatic  
668 genome annotation and pathway reconstruction server. *Nucleic Acids Res.* 35:W182–5. doi:  
669 10.1093/nar/gkm321.
- 670 Müller GB, Wagner GP. 1991. Novelty in Evolution: Restructuring the Concept. *Annu. Rev.*  
671 *Ecol. Syst.* 22:229–256. doi: 10.1146/annurev.es.22.110191.001305.
- 672 Muschick M, Indermaur A, Salzburger W. 2012. Convergent evolution within an adaptive  
673 radiation of cichlid fishes. *Curr. Biol.* 22:2362–8. doi: 10.1016/j.cub.2012.10.048.
- 674 Nagy LG et al. 2014. Latent homology and convergent regulatory evolution underlies the  
675 repeated emergence of yeasts. *Nat. Commun.* 5:4471. doi: 10.1038/ncomms5471.
- 676 Notredame C, Higgins DG, Heringa J. 2000. T-coffee: a novel method for fast and accurate  
677 multiple sequence alignment. *J. Mol. Biol.* 302:205–217. doi: 10.1006/jmbi.2000.4042.
- 678 Panchen AL. 2007. Homology - History of a Concept. In: John Wiley & Sons, Ltd. pp. 5–23.  
679 doi: 10.1002/9780470515655.ch2.
- 680 Pankey MS, Minin VN, Imholte GC, Suchard MA, Oakley TH. 2014. Predictable

681 transcriptome evolution in the convergent and complex bioluminescent organs of squid. Proc.  
682 Natl. Acad. Sci. U. S. A. 111:E4736–42. doi: 10.1073/pnas.1416574111.

683 Parichy DM. 2009. Animal pigment pattern: an integrative model system for studying the  
684 development, evolution, and regeneration of form. Semin. Cell Dev. Biol. 20:63–4. doi:  
685 10.1016/j.semcdb.2008.12.010.

686 Parichy DM, Spiewak JE. 2015. Origins of adult pigmentation: diversity in pigment stem cell  
687 lineages and implications for pattern evolution. Pigment Cell Melanoma Res. 28:31–50. doi:  
688 10.1111/pcmr.12332.

689 Patterson LB, Bain EJ, Parichy DM. 2014. Pigment cell interactions and differential  
690 xanthophore recruitment underlying zebrafish stripe reiteration and Danio pattern evolution.  
691 Nat. Commun. 5:5299. doi: 10.1038/ncomms6299.

692 Pigliucci M, Müller GB. 2010. Evolution: The Extended Synthesis. MIT Press.

693 Plestant C, Anton ES. 2013. Scaling the MAPK Signaling Threshold during CNS Patterning.  
694 Dev. Cell. 25:221–222. doi: 10.1016/j.devcel.2013.04.014.

695 Reissmann M, Ludwig A. 2013. Pleiotropic effects of coat colour-associated mutations in  
696 humans, mice and other mammals. Semin. Cell Dev. Biol. 24:576–586. doi:  
697 10.1016/j.semcdb.2013.03.014.

698 Roberts RB, Moore EC, Kocher TD. 2017. An allelic series at *pax7a* is associated with  
699 colour polymorphism diversity in Lake Malawi cichlid fish. Mol. Ecol. 26:2625–2639. doi:  
700 10.1111/mec.13975.

701 Robinson MD, McCarthy DJ, Smyth GK. 2010. edgeR: a Bioconductor package for  
702 differential expression analysis of digital gene expression data. Bioinformatics. 26:139–40.  
703 doi: 10.1093/bioinformatics/btp616.

704 Robinson MD, Smyth GK. 2007. Moderated statistical tests for assessing differences in tag  
705 abundance. Bioinformatics. 23:2881–7. doi: 10.1093/bioinformatics/btm453.



- 706 Robinson MD, Smyth GK. 2008. Small-sample estimation of negative binomial dispersion,  
707 with applications to SAGE data. *Biostatistics*. 9:321–32. doi: 10.1093/biostatistics/kxm030.
- 708 Salzburger W. 2009. The interaction of sexually and naturally selected traits in the adaptive  
709 radiations of cichlid fishes. *Mol. Ecol.* 18:169–85. doi: 10.1111/j.1365-294X.2008.03981.x.
- 710 Salzburger W, Braasch I, Meyer A. 2007. Adaptive sequence evolution in a color gene  
711 involved in the formation of the characteristic egg-dummies of male haplochromine cichlid  
712 fishes. *BMC Biol.* 5:51. doi: 10.1186/1741-7007-5-51.
- 713 Salzburger W, Mack T, Verheyen E, Meyer A. 2005. Out of Tanganyika: genesis, explosive  
714 speciation, key-innovations and phylogeography of the haplochromine cichlid fishes. *BMC*  
715 *Evol. Biol.* 5:17. doi: 10.1186/1471-2148-5-17.
- 716 San-Jose LM et al. 2015. Effect of the MC1R gene on sexual dimorphism in melanin-based  
717 colorations. *Mol. Ecol.* 24:2794–808. doi: 10.1111/mec.13193.
- 718 Santos ME et al. 2016. Comparative transcriptomics of anal fin pigmentation patterns in  
719 cichlid fishes. *BMC Genomics*. 17:712. doi: 10.1186/s12864-016-3046-y.
- 720 Santos ME et al. 2014. The evolution of cichlid fish egg-spots is linked with a cis-regulatory  
721 change. *Nat. Commun.* 5:5149. doi: 10.1038/ncomms6149.
- 722 Santos ME, Salzburger W. 2012. Evolution. How cichlids diversify. *Science*. 338:619–21.  
723 doi: 10.1126/science.1224818.
- 724 Schneider PN, Slusarski DC, Houston DW. 2012. Differential role of Axin RGS domain  
725 function in Wnt signaling during anteroposterior patterning and maternal axis formation.  
726 *PLoS One*. 7:e44096. doi: 10.1371/journal.pone.0044096.
- 727 Shannon P et al. 2003. Cytoscape: a software environment for integrated models of  
728 biomolecular interaction networks. *Genome Res*. 13:2498–504. doi: 10.1101/gr.1239303.
- 729 Shellswell GB, Bailey AJ, Duance VC, Restall DJ. 1980. Has collagen a role in muscle  
730 pattern formation in the developing chick wing? 1. An immunofluorescence study. *J.*

- 731 Embryol. Exp. Morphol. 60:245–54. <http://www.ncbi.nlm.nih.gov/pubmed/7031161>
- 732 (Accessed June 2, 2016).
- 733 Shen Y-Y, Liang L, Li G-S, Murphy RW, Zhang Y-P. 2012. Parallel evolution of auditory
- 734 genes for echolocation in bats and toothed whales. PLoS Genet. 8:e1002788. doi:
- 735 10.1371/journal.pgen.1002788.
- 736 Shimeld SM, Holland PW. 2000. Vertebrate innovations. Proc. Natl. Acad. Sci. U. S. A.
- 737 97:4449–52. <http://www.ncbi.nlm.nih.gov/pubmed/10781042> (Accessed November 7, 2016).
- 738 Shin MK, Levorse JM, Ingram RS, Tilghman SM. 1999. The temporal requirement for
- 739 endothelin receptor-B signalling during neural crest development. Nature. 402:496–501. doi:
- 740 10.1038/990040.
- 741 Shirai LT et al. 2012. Evolutionary history of the recruitment of conserved developmental
- 742 genes in association to the formation and diversification of a novel trait. BMC Evol. Biol.
- 743 12:21. doi: 10.1186/1471-2148-12-21.
- 744 Shubin N, Tabin C, Carroll S. 2009. Deep homology and the origins of evolutionary novelty.
- 745 Nature. 457:818–823. doi: 10.1038/nature07891.
- 746 Singh AP, Nüsslein-Volhard C. 2015. Zebrafish Stripes as a Model for Vertebrate Colour
- 747 Pattern Formation. Curr. Biol. 25:R81–R92. doi: 10.1016/j.cub.2014.11.013.
- 748 Soltis PS, Soltis DE. 2016. Ancient WGD events as drivers of key innovations in
- 749 angiosperms. Curr. Opin. Plant Biol. 30:159–65. doi: 10.1016/j.pbi.2016.03.015.
- 750 Stern DL. 2013. The genetic causes of convergent evolution. Nat. Rev. Genet. 14:751–64.
- 751 doi: 10.1038/nrg3483.
- 752 Theis A, Bosia T, Roth T, Salzburger W, Egger B. 2015. Egg-spot pattern and body size
- 753 asymmetries influence male aggression in haplochromine cichlid fishes. Behav. Ecol. arv104.
- 754 doi: 10.1093/beheco/arv104.
- 755 Theis A, Salzburger W, Egger B. 2012. The function of anal fin egg-spots in the cichlid fish

- 756 Astatotilapia burtoni. PLoS One. 7:e29878. doi: 10.1371/journal.pone.0029878.
- 757 Uy JAC et al. 2016. Mutations in different pigmentation genes are associated with parallel  
758 melanism in island flycatchers. Proc. Biol. Sci. 283. doi: 10.1098/rspb.2016.0731.
- 759 Wagner GP. 2014. Homology, genes and evolutionary innovation. Princet. Univ. Press.  
760 Princet.
- 761 Wagner GP. 2007. The developmental genetics of homology. Nat. Rev. Genet. 8:473–9. doi:  
762 10.1038/nrg2099.
- 763 Wagner GP, Lynch VJ. 2008. The gene regulatory logic of transcription factor evolution.  
764 Trends Ecol. Evol. 23:377–85. doi: 10.1016/j.tree.2008.03.006.
- 765 Watanabe M, Kondo S. 2015. Is pigment patterning in fish skin determined by the Turing  
766 mechanism? Trends Genet. 31:88–96. doi: 10.1016/j.tig.2014.11.005.
- 767 Wickler W. 1962. ‘Egg-dummies’ as Natural Releasers in Mouth-breeding Cichlids. Nature.  
768 194:1092–1093. doi: 10.1038/1941092a0.
- 769 Yang Z. 2007. PAML 4: phylogenetic analysis by maximum likelihood. Mol. Biol. Evol.  
770 24:1586–91. doi: 10.1093/molbev/msm088.
- 771 Yang Z. 1997. PAML: a program package for phylogenetic analysis by maximum likelihood.  
772 Comput. Appl. Biosci. 13:555–6. <http://www.ncbi.nlm.nih.gov/pubmed/9367129> (Accessed  
773 April 16, 2016).
- 774 Yong LW, Yu J-K. 2016. Tracing the evolutionary origin of vertebrate skeletal tissues:  
775 insights from cephalochordate amphioxus. Curr. Opin. Genet. Dev. 39:55–62. doi:  
776 10.1016/j.gde.2016.05.022.
- 777 Zhang P et al. 2012. Silencing of GPNMB by siRNA inhibits the formation of melanosomes  
778 in melanocytes in a MITF-independent fashion. PLoS One. 7:e42955. doi:  
779 10.1371/journal.pone.0042955.
- 780 Zhou X, Lindsay H, Robinson MD. 2013. Robustly detecting differential expression in RNA

781 sequencing data using observation weights. 18. <http://arxiv.org/abs/1312.3382> (Accessed  
782 April 12, 2016).
